# Supplementary material for: Molecular Patterns Based on Immunogenomic Signatures Stratify the Prognosis of Colon Cancer
Source: Front Bioeng Biotechnol. 2022 Feb 14;10:820092. doi: 10.3389/fbioe.2022.820092 (PMC8884696; doi:10.3389/fbioe.2022.820092)
Supplement: Supplementary file 5 [file DataSheet1.CSV]

submitter_id.samples	age	M_stage	N_stage	T	gender	tumor_stage	disease_type	status	time	Risk_score
TCGA.DM.A288.01A	68	M0	N2	T3	Male	S3	Adenocarcinoma	Dead	854	0.272951868
TCGA.QL.A97D.01A	84	M0	N0	T2	Female	S1	Adenocarcinoma	Alive	666	0.548708911
TCGA.CM.6164.01A	46	M0	N0	T3	Female	S2	Mucinous adenocarcinoma	Alive	883	0.507667973
TCGA.G4.6299.01A	69	M0	N2	T3	Male	S3	Adenocarcinoma	Alive	2268	0.737131521
TCGA.F4.6463.01A	51	M0	N0	T3	Male	S2	Adenocarcinoma	Alive	1087	0.499228611
TCGA.AZ.4615.01A	84	M0	N1	T3	Male	S3	Adenocarcinoma	Alive	1002	0.544094014
TCGA.AA.3549.01A	69	M0	N0	T2	Male	S1	Adenocarcinoma	Alive	639	0.657330029
TCGA.CM.4752.01A	58	M0	N0	T3	Male	S2	Adenocarcinoma	Alive	396	0.470527788
TCGA.DM.A1D9.01A	67	M0	N0	T3	Female	S2	Adenocarcinoma	Alive	4270	0.451099157
TCGA.AA.3688.01A	80	M1	N1	T3	Male	S4	Adenocarcinoma	Alive	578	0.267990847
TCGA.AA.3854.01A	71	M0	N0	T2	Female	S1	Adenocarcinoma	Alive	1096	0.231024502
TCGA.A6.3809.01A	71	M0	N0	T4	Female	S2	Adenocarcinoma	Alive	996	0.486446656
TCGA.CM.6165.01A	74	M0	N0	T3	Male	S2	Adenocarcinoma	Alive	488	0.413845514
TCGA.CM.4751.01A	62	M0	N1	T3	Male	S3	Adenocarcinoma	Alive	822	0.763522564
TCGA.A6.5659.01A	82	M0	N0	T2	Male	S1	Adenocarcinoma	Alive	926	0.44746919
TCGA.AA.3494.01A	55	M1	N0	T3	Male	S4	Adenocarcinoma	Alive	31	0.292663325
TCGA.CM.4750.01A	34	M0	N1	T1	Female	S3	Adenocarcinoma	Alive	244	0.359318713
TCGA.AZ.4682.01B	61	M1	N0	T3	Male	S4	Adenocarcinoma	Dead	680	0.496534571
TCGA.G4.6625.01A	77	M0	N0	T3	Female	S2	Adenocarcinoma	Alive	2792	0.481874339
TCGA.DM.A0XF.01A	68	M0	N2	T3	Female	S3	Adenocarcinoma	Dead	1162	0.401128814
TCGA.AA.3949.01A	87	M0	N1	T3	Female	S3	Adenocarcinoma	Alive	791	0.612967283
TCGA.AA.3848.01A	82	M0	N2	T3	Female	S3	Adenocarcinoma	Dead	336	0.405538108
TCGA.CA.6715.01A	63	M0	N1	T3	Male	S3	Adenocarcinoma	Alive	383	0.268955818
TCGA.AA.3818.01A	78	M0	N0	T3	Female	S2	Adenocarcinoma	Dead	30	0.404042571
TCGA.AA.3710.01A	80	M0	N0	T3	Female	S2	Adenocarcinoma	Alive	821	0.550497858
TCGA.AA.3950.01A	79	M0	N0	T3	Female	S2	Adenocarcinoma	Alive	730	0.73516292
TCGA.AA.A00N.01A	75	M0	N0	T4	Male	S2	Adenocarcinoma	Dead	122	0.667544205
TCGA.A6.6138.01A	61	M0	N0	T2	Male	S1	Adenocarcinoma	Alive	685	0.496926287
TCGA.DM.A28E.01A	72	M0	N0	T3	Female	S2	Adenocarcinoma	Alive	3648	0.210627345
TCGA.D5.6538.01A	79	M0	N2	T3	Female	S3	Adenocarcinoma	Alive	521	0.172771835
TCGA.AA.A00K.01A	79	M0	N0	T3	Male	S2	Adenocarcinoma	Alive	549	0.452221763
TCGA.AA.3715.01A	77	M0	N0	T3	Male	S2	Mucinous adenocarcinoma	Dead	609	0.699227289
TCGA.AA.3506.01A	77	M0	N0	T2	Male	S1	Adenocarcinoma	Alive	1765	0.382494277
TCGA.AU.3779.01A	80	M0	N0	T3	Female	S2	Adenocarcinoma	Alive	441	0.490103173
TCGA.CK.5916.01A	71	M0	N0	T1	Female	S1	Adenocarcinoma	Dead	643	0.364055739
TCGA.QG.A5Z1.01A	71	M0	N1	T3	Male	S3	Adenocarcinoma	Dead	458	0.343363929
TCGA.A6.2685.01A	48	M0	N0	T3	Female	S2	Mucinous adenocarcinoma	Alive	1133	0.529921665
TCGA.AA.A00W.01A	80	M0	N0	T1	Male	S1	Adenocarcinoma	Alive	456	0.305190336
TCGA.CK.5914.01A	81	M0	N1	T3	Male	S3	Mucinous adenocarcinoma	Alive	669	0.364200204
TCGA.A6.2686.01A	81	M0	N0	T3	Female	S2	Adenocarcinoma	Dead	1614	0.567200757
TCGA.CA.5255.01A	45	M0	N0	T3	Male	S2	Adenocarcinoma	Alive	376	0.350943979
TCGA.A6.A5ZU.01A	59	M0	N1	T3	Male	S3	Adenocarcinoma	Alive	293	0.47189157
TCGA.NH.A50V.01A	69	M0	N2	T3	Male	S3	Adenocarcinoma	Alive	588	0.630421804
TCGA.QG.A5YX.01A	61	M0	N0	T3	Female	S2	Adenocarcinoma	Alive	1003	0.166206523
TCGA.A6.2677.01A	68	M0	N2	T3	Female	S3	Adenocarcinoma	Dead	1281	0.231141178
TCGA.CA.6717.01A	57	M0	N0	T3	Male	S2	Adenocarcinoma	Alive	388	0.51774082
TCGA.A6.6649.01A	66	M0	N1	T3	Male	S3	Adenocarcinoma	Alive	735	0.59463022
TCGA.NH.A6GC.01A	66	M1	N1	T4	Female	S4	Adenocarcinoma	Alive	389	0.481945628
TCGA.AA.3562.01A	82	M0	N2	T3	Male	S3	Adenocarcinoma	Alive	608	0.299785104
TCGA.A6.4105.01A	79	M0	N0	T3	Male	S2	Adenocarcinoma	Dead	442	0.588466025
TCGA.A6.6141.01A	31	M0	N0	T3	Male	S2	Adenocarcinoma	Alive	255	0.305291159
TCGA.AA.A00R.01A	64	M0	N0	T2	Female	S1	Mucinous adenocarcinoma	Alive	30	0.55245886
TCGA.AZ.4684.01A	49	M1	N2	T3	Male	S4	Adenocarcinoma	Alive	1977	0.690013924
TCGA.CK.6747.01A	87	M0	N0	T3	Female	S2	Adenocarcinoma	Alive	820	0.391176827
TCGA.AU.6004.01A	69	M0	N0	T2	Female	S1	Mucinous adenocarcinoma	Alive	824	0.64898034
TCGA.A6.2672.01B	82	M0	N1	T3	Female	S3	Adenocarcinoma	Alive	1419	0.736350195
TCGA.QG.A5Z2.01A	61	M0	N0	T2	Male	S1	Adenocarcinoma	Alive	952	0.28532263
TCGA.A6.6780.01A	74	M0	N0	T3	Male	S2	Adenocarcinoma	Alive	612	0.461839621
TCGA.F4.6459.01A	61	M0	N2	T3	Female	S3	Adenocarcinoma	Dead	262	0.642875535
TCGA.AA.3970.01A	65	M0	N0	T3	Male	S2	Adenocarcinoma	Alive	1096	0.31996148
TCGA.NH.A8F7.01A	53	M0	N0	T3	Female	S2	Mucinous adenocarcinoma	Alive	543	0.146621771
TCGA.G4.6321.01A	60	M0	N1	T2	Female	S3	Adenocarcinoma	Alive	672	0.311464599
TCGA.AA.3524.01A	85	M0	N0	T3	Male	S2	Adenocarcinoma	Alive	1096	0.396462909
TCGA.DM.A1D0.01A	79	M0	N0	T3	Female	S2	Adenocarcinoma	Alive	3974	0.112529945
TCGA.G4.6307.01A	37	M0	N1	T3	Female	S3	Adenocarcinoma	Alive	1674	0.140887196
TCGA.DM.A1HB.01A	75	M0	N1	T3	Male	S3	Adenocarcinoma	Alive	4126	0.564406304
TCGA.AA.3697.01A	77	M0	N0	T3	Male	S2	Adenocarcinoma	Alive	2587	0.454497559
TCGA.CM.6679.01A	58	M0	N0	T3	Male	S2	Adenocarcinoma	Alive	306	0.630622938
TCGA.A6.2684.01C	75	M0	N0	T2	Female	S1	Adenocarcinoma	Alive	1127	0.445786048
TCGA.AZ.4323.01A	37	M1	N2	T4	Male	S4	Adenocarcinoma	Dead	43	0.670222735
TCGA.AA.3971.01A	58	M0	N1	T3	Male	S3	Adenocarcinoma	Alive	489	0.333803243
TCGA.AA.3989.01A	84	M1	N2	T3	Male	S4	Mucinous adenocarcinoma	Dead	242	0.441903226
TCGA.AA.A00D.01A	70	M0	N0	T2	Male	S1	Adenocarcinoma	Alive	578	0.432734827
TCGA.AD.6548.01A	81	M0	N0	T2	Female	S1	Adenocarcinoma	Alive	650	0.622014652
TCGA.A6.2674.01A	71	M1	N2	T3	Male	S4	Adenocarcinoma	Alive	1331	0.756253148
TCGA.AZ.4614.01A	71	M1	N1	T4	Female	S4	Adenocarcinoma	Dead	172	0.537102806
TCGA.A6.5664.01A	80	M0	N2	T4	Male	S3	Adenocarcinoma	Alive	672	0.646031264
TCGA.AZ.4315.01A	61	M0	N0	T3	Male	S2	Adenocarcinoma	Alive	1776	0.467721528
TCGA.F4.6806.01A	59	M0	N0	T2	Female	S1	Adenocarcinoma	Alive	1260	0.355676826
TCGA.AA.3510.01A	70	M0	N0	T3	Male	S2	Adenocarcinoma	Alive	1946	0.434971926
TCGA.AY.A71X.01A	54	M0	N0	T2	Female	S1	Mucinous adenocarcinoma	Alive	588	0.151356462
TCGA.AA.3488.01A	58	M1	N2	T3	Male	S4	Adenocarcinoma	Dead	153	0.350995849
TCGA.DM.A28F.01A	73	M0	N1	T3	Male	S3	Adenocarcinoma	Dead	2188	0.328044414
TCGA.G4.6293.01A	49	M0	N1	T3	Female	S3	Adenocarcinoma	Alive	4051	0.430866844
TCGA.5M.AAT4.01A	74	M1	N0	T3	Male	S4	Adenocarcinoma	Dead	49	0.273123373
TCGA.A6.5657.01A	65	M0	N1	T3	Male	S3	Adenocarcinoma	Alive	962	0.67621474
TCGA.AA.3941.01A	84	M1	N1	T4	Female	S4	Adenocarcinoma	Alive	730	0.304570804
TCGA.DM.A28K.01A	75	M0	N0	T3	Male	S2	Mucinous adenocarcinoma	Alive	2988	0.279258094
TCGA.CM.5344.01A	39	M0	N1	T3	Female	S3	Adenocarcinoma	Alive	670	0.469155582
TCGA.AA.3517.01A	60	M0	N0	T3	Male	S2	Adenocarcinoma	Alive	1186	0.436675999
TCGA.G4.6309.01A	40	M0	N1	T3	Female	S3	Adenocarcinoma	Alive	2600	0.41010157
TCGA.AY.6386.01A	66	M0	N1	T3	Female	S3	Adenocarcinoma	Alive	542	0.470130087
TCGA.AA.3678.01A	60	M0	N1	T2	Female	S3	Adenocarcinoma	Alive	1430	0.274472853
TCGA.AA.A01X.01A	80	M0	N1	T2	Female	S3	Adenocarcinoma	Alive	791	0.470710205
TCGA.AA.3821.01A	81	M0	N0	T2	Female	S1	Adenocarcinoma	Alive	31	0.38727053
TCGA.CM.6677.01A	75	M0	N0	T3	Female	S2	Adenocarcinoma	Alive	337	0.487858786
TCGA.CM.5861.01A	63	M0	N0	T3	Female	S2	Adenocarcinoma	Alive	457	0.509775288
TCGA.D5.6923.01A	57	M0	N0	T2	Male	S1	Adenocarcinoma	Alive	378	0.620306325
TCGA.F4.6703.01A	64	M0	N0	T3	Male	S2	Adenocarcinoma	Alive	1456	0.844741988
TCGA.AZ.6605.01A	77	M0	N1	T4	Male	S3	Mucinous adenocarcinoma	Dead	159	0.572562683
TCGA.A6.2677.01B	68	M0	N2	T3	Female	S3	Adenocarcinoma	Dead	1281	0.340205197
TCGA.NH.A6GB.01A	71	M0	N2	T3	Female	S3	Adenocarcinoma	Alive	476	0.400756883
TCGA.CM.5349.01A	68	M0	N0	T3	Female	S2	Adenocarcinoma	Alive	915	0.4783584
TCGA.NH.A50U.01A	42	M1	N0	T4	Male	S4	Mucinous adenocarcinoma	Dead	334	0.339965967
TCGA.AA.3530.01A	80	M0	N0	T2	Male	S1	Adenocarcinoma	Alive	580	0.229907669
TCGA.G4.6627.01A	84	M0	N0	T3	Male	S2	Adenocarcinoma	Alive	2175	0.666439028
TCGA.DM.A28G.01A	75	M0	N0	T3	Male	S2	Adenocarcinoma	Dead	3698	0.208822718
TCGA.D5.6537.01A	64	M0	N1	T3	Male	S3	Mucinous adenocarcinoma	Dead	283	0.393393711
TCGA.D5.5539.01A	60	M0	N1	T3	Male	S3	Adenocarcinoma	Alive	596	0.528194898
TCGA.CM.6163.01A	74	M0	N0	T1	Male	S1	Adenocarcinoma	Alive	427	0.448149327
TCGA.CM.4744.01A	69	M0	N0	T2	Male	S1	Adenocarcinoma	Alive	609	0.35444251
TCGA.AA.A004.01A	76	M0	N0	T3	Male	S2	Adenocarcinoma	Alive	424	0.518551607
TCGA.A6.3808.01A	73	M0	N0	T3	Male	S2	Adenocarcinoma	Alive	1014	0.65752828
TCGA.AA.A010.01A	46	M0	N0	T4	Female	S2	Adenocarcinoma	Alive	1064	0.376109112
TCGA.AA.A02J.01A	70	M1	N0	T3	Female	S4	Adenocarcinoma	Dead	153	0.19689911
TCGA.AA.3837.01A	67	M0	N0	T3	Male	S2	Adenocarcinoma	Alive	1186	0.427548364
TCGA.CK.4947.01B	46	M0	N1	T4	Female	S3	Adenocarcinoma	Alive	534	0.406873968
TCGA.CA.5256.01A	54	M0	N0	T3	Female	S2	Adenocarcinoma	Alive	379	0.144951088
TCGA.CM.6167.01A	57	M0	N2	T3	Female	S3	Adenocarcinoma	Alive	456	0.498377468
TCGA.4N.A93T.01A	67	M0	N1	T4	Male	S3	Adenocarcinoma	Alive	146	0.224492265
TCGA.CA.5797.01A	56	M0	N0	T3	Male	S2	Adenocarcinoma	Alive	383	0.331340917
TCGA.CM.6166.01A	48	M0	N0	T2	Female	S1	Adenocarcinoma	Alive	669	0.367313197
TCGA.CK.4951.01A	79	M0	N0	T3	Female	S2	Mucinous adenocarcinoma	Dead	4268	0.542769645
TCGA.CA.6719.01A	77	M0	N0	T3	Male	S2	Adenocarcinoma	Alive	435	0.610512173
TCGA.AA.A02R.01A	84	M0	N0	T3	Female	S2	Adenocarcinoma	Dead	670	0.639830128
TCGA.AA.A02O.01A	82	M0	N0	T3	Male	S2	Mucinous adenocarcinoma	Alive	28	0.370087382
TCGA.A6.5666.01A	78	M0	N0	T4	Male	S2	Adenocarcinoma	Alive	995	0.233198574
TCGA.AY.5543.01A	65	M1	N1	T3	Female	S4	Adenocarcinoma	Alive	1004	0.383372442
TCGA.F4.6704.01A	60	M0	N2	T3	Male	S3	Mucinous adenocarcinoma	Alive	47	0.67049739
TCGA.AA.3856.01A	59	M0	N0	T3	Male	S2	Adenocarcinoma	Alive	30	0.337604638
TCGA.AA.A00Q.01A	66	M0	N1	T4	Female	S3	Adenocarcinoma	Alive	1278	0.338993133
TCGA.AA.A00F.01A	66	M0	N2	T3	Male	S3	Mucinous adenocarcinoma	Alive	1035	0.782550225
TCGA.D5.6920.01A	77	M0	N0	T3	Female	S2	Adenocarcinoma	Alive	377	0.556907582
TCGA.AA.3815.01A	65	M0	N0	T3	Female	S2	Adenocarcinoma	Alive	1005	0.464497229
TCGA.D5.5538.01A	60	M0	N1	T3	Female	S3	Adenocarcinoma	Dead	2034	0.602275015
TCGA.AA.3867.01A	74	M1	N2	T3	Male	S4	Adenocarcinoma	Alive	731	0.363109981
TCGA.A6.6782.01A	82	M0	N0	T4	Male	S2	Mucinous adenocarcinoma	Alive	617	0.57272143
TCGA.A6.6654.01A	65	M0	N1	T3	Female	S3	Adenocarcinoma	Alive	726	0.701125003
TCGA.AA.A01D.01A	47	M0	N2	T3	Female	S3	Adenocarcinoma	Dead	364	0.582145085
TCGA.G4.6311.01A	80	M0	N1	T3	Male	S3	Adenocarcinoma	Alive	1199	0.571741626
TCGA.A6.3807.01A	53	M0	N2	T3	Female	S3	Mucinous adenocarcinoma	Alive	1054	0.515459974
TCGA.AZ.5403.01A	43	M0	N0	T3	Male	S2	Adenocarcinoma	Dead	1910	0.631858923
TCGA.AD.6888.01A	73	M0	N1	T3	Male	S3	Adenocarcinoma	Dead	627	0.296765697
TCGA.G4.6628.01A	78	M0	N0	T2	Male	S1	Adenocarcinoma	Alive	2424	0.601371596
TCGA.DM.A1D6.01A	88	M0	N0	T3	Male	S2	Adenocarcinoma	Dead	1140	0.157675022
TCGA.CM.5341.01A	82	M0	N1	T2	Female	S3	Mucinous adenocarcinoma	Alive	884	0.519117639
TCGA.AA.3862.01A	82	M0	N0	T3	Male	S2	Mucinous adenocarcinoma	Alive	914	0.576967897
TCGA.AA.3939.01A	83	M0	N0	T3	Male	S2	Adenocarcinoma	Alive	395	0.580661111
TCGA.AA.3514.01A	81	M0	N0	T2	Female	S1	Adenocarcinoma	Alive	31	0.400538978
TCGA.AA.3660.01A	51	M0	N0	T3	Female	S2	Adenocarcinoma	Alive	2375	0.284197702
TCGA.AA.3833.01A	63	M0	N0	T3	Female	S2	Adenocarcinoma	Alive	485	0.690858596
TCGA.AA.A01P.01A	80	M0	N1	T3	Female	S3	Adenocarcinoma	Dead	1158	0.572956915
TCGA.AA.A00Z.01A	70	M0	N0	T3	Male	S2	Mucinous adenocarcinoma	Alive	669	0.274041856
TCGA.CM.5863.01A	60	M0	N1	T3	Female	S3	Adenocarcinoma	Alive	457	0.681173068
TCGA.AZ.6598.01A	77	M0	N0	T3	Female	S2	Adenocarcinoma	Dead	1503	0.626480828
TCGA.AA.3679.01A	59	M1	N2	T3	Male	S4	Adenocarcinoma	Alive	457	0.371947684
TCGA.G4.6304.01A	66	M0	N0	T4	Female	S2	Adenocarcinoma	Alive	1631	0.352573241
TCGA.DM.A285.01A	71	M1	N2	T3	Female	S4	Adenocarcinoma	Dead	179	0.49652757
TCGA.G4.6294.01A	75	M1	N1	T3	Male	S4	Adenocarcinoma	Dead	858	0.40939509
TCGA.A6.4107.01A	57	M0	N1	T3	Female	S3	Adenocarcinoma	Alive	987	0.388246659
TCGA.DM.A1D4.01A	80	M0	N0	T3	Male	S2	Adenocarcinoma	Dead	5642	0.20372166
TCGA.CA.6716.01A	65	M0	N0	T3	Male	S2	Mucinous adenocarcinoma	Alive	371	0.312661685
TCGA.CK.4952.01A	48	M0	N2	T4	Female	S3	Adenocarcinoma	Alive	475	0.516043519
TCGA.AA.A01V.01A	59	M0	N0	T2	Male	S1	Adenocarcinoma	Alive	31	0.363878744
TCGA.AA.3844.01A	78	M0	N2	T3	Female	S3	Adenocarcinoma	Alive	454	0.306670228
TCGA.D5.6541.01A	49	M0	N0	T3	Male	S2	Adenocarcinoma	Alive	474	0.498170732
TCGA.AA.A01G.01A	63	M0	N0	T3	Male	S2	Adenocarcinoma	Alive	365	0.329286102
TCGA.AA.3870.01A	71	M1	N2	T3	Female	S4	Mucinous adenocarcinoma	Alive	912	0.582631892
TCGA.D5.6532.01A	61	M0	N0	T3	Male	S2	Adenocarcinoma	Alive	555	0.290903764
TCGA.CM.6169.01A	67	M0	N0	T3	Male	S2	Adenocarcinoma	Alive	396	0.614019696
TCGA.D5.5541.01A	63	M0	N1	T3	Male	S3	Adenocarcinoma	Alive	1701	0.377247156
TCGA.DM.A1DB.01A	68	M0	N0	T3	Male	S2	Adenocarcinoma	Dead	2696	0.276607875
TCGA.AA.A00A.01A	80	M0	N0	T3	Male	S2	Adenocarcinoma	Alive	1157	0.572111976
TCGA.D5.6530.01A	53	M0	N0	T2	Male	S1	Adenocarcinoma	Alive	621	0.481617763
TCGA.A6.2684.01A	75	M0	N0	T2	Female	S1	Adenocarcinoma	Alive	1127	0.470302832
TCGA.AA.3855.01A	72	M0	N0	T2	Male	S1	Adenocarcinoma	Alive	975	0.339263788
TCGA.CM.5868.01A	59	M1	N1	T4	Female	S4	Adenocarcinoma	Alive	518	0.598247157
TCGA.AA.3519.01A	63	M0	N1	T3	Male	S3	Adenocarcinoma	Alive	276	0.426535855
TCGA.AA.3526.01A	57	M0	N0	T2	Male	S1	Adenocarcinoma	Alive	580	0.410558838
TCGA.DM.A28M.01A	63	M0	N0	T3	Male	S2	Adenocarcinoma	Alive	2895	0.306333131
TCGA.D5.6926.01A	65	M0	N1	T4	Male	S3	Adenocarcinoma	Alive	275	0.582145223
TCGA.AA.3534.01A	78	M0	N0	T3	Female	S2	Mucinous adenocarcinoma	Alive	882	0.273604647
TCGA.G4.6317.01A	51	M0	N2	T3	Female	S3	Mucinous adenocarcinoma	Alive	1095	0.185848586
TCGA.AA.A03J.01A	65	M0	N0	T2	Female	S1	Adenocarcinoma	Alive	1246	0.325701325
TCGA.CM.6680.01A	78	M0	N2	T3	Female	S3	Adenocarcinoma	Alive	366	0.423134953
TCGA.AA.A01K.01A	74	M0	N2	T3	Female	S3	Adenocarcinoma	Alive	943	0.469254118
TCGA.D5.6536.01A	73	M0	N0	T3	Male	S2	Adenocarcinoma	Alive	543	0.732705337
TCGA.AD.A5EK.01A	51	M0	N0	T2	Male	S1	Adenocarcinoma	Alive	500	0.344330781
TCGA.AA.3663.01A	42	M0	N0	T3	Male	S2	Adenocarcinoma	Alive	212	0.345948066
TCGA.AZ.6607.01A	69	M1	N2	T4	Male	S4	Adenocarcinoma	Dead	97	1.135614211
TCGA.AA.3520.01A	86	M0	N0	T3	Female	S2	Adenocarcinoma	Alive	731	0.427612353
TCGA.AA.3543.01A	84	M0	N0	T2	Male	S1	Adenocarcinoma	Alive	30	0.355688175
TCGA.AZ.5407.01A	51	M0	N0	T1	Female	S1	Mucinous adenocarcinoma	Alive	2683	0.337346674
TCGA.G4.6314.01A	76	M1	N2	T3	Female	S4	Mucinous adenocarcinoma	Alive	1093	0.516599585
TCGA.CM.5348.01A	72	M0	N1	T3	Male	S3	Adenocarcinoma	Alive	699	0.558810226
TCGA.CK.6751.01A	88	M0	N0	T2	Female	S1	Adenocarcinoma	Alive	518	0.514391255
TCGA.D5.6929.01A	49	M1	N1	T3	Female	S4	Adenocarcinoma	Alive	408	0.416507692
TCGA.AA.3675.01A	84	M0	N0	T3	Male	S2	Adenocarcinoma	Alive	1431	0.341594922
TCGA.A6.2681.01A	73	M0	N0	T3	Female	S2	Mucinous adenocarcinoma	Alive	1387	0.621148596
TCGA.AA.3869.01A	76	M1	N2	T4	Male	S4	Adenocarcinoma	Dead	822	0.293176024
TCGA.DM.A282.01A	60	M0	N0	T3	Female	S2	Adenocarcinoma	Alive	4233	0.296531766
TCGA.D5.7000.01A	79	M0	N0	T2	Female	S1	Adenocarcinoma	Alive	312	0.471498674
TCGA.AM.5821.01A	68	M0	N0	T3	Female	S2	Adenocarcinoma	Alive	28	0.847773917
TCGA.AA.A01S.01A	47	M0	N1	T3	Female	S3	Adenocarcinoma	Alive	31	0.14483907
TCGA.NH.A8F8.01A	79	M1	N2	T4	Male	S4	Adenocarcinoma	Dead	678	0.458134286
TCGA.AA.3966.01A	89	M0	N0	T3	Female	S2	Adenocarcinoma	Alive	61	0.646971784
TCGA.AA.3516.01A	74	M0	N2	T3	Female	S3	Mucinous adenocarcinoma	Dead	396	0.614602625
TCGA.A6.2676.01A	75	M0	N0	T4	Female	S2	Adenocarcinoma	Dead	2016	0.743503461
TCGA.AA.3846.01A	74	M0	N0	T3	Female	S2	Adenocarcinoma	Alive	518	0.40169377
TCGA.AA.3544.01A	68	M0	N0	T2	Male	S1	Adenocarcinoma	Alive	426	0.401954146
TCGA.AA.3956.01A	65	M0	N0	T3	Male	S2	Adenocarcinoma	Alive	1035	0.3989664
TCGA.AA.3532.01A	63	M0	N0	T3	Male	S2	Mucinous adenocarcinoma	Alive	882	0.375316593
TCGA.AA.3955.01A	38	M0	N2	T2	Male	S3	Adenocarcinoma	Alive	638	0.360058349
TCGA.CK.5912.01A	81	M0	N0	T2	Male	S1	Adenocarcinoma	Dead	2959	0.31325273
TCGA.AD.6895.01A	84	M0	N1	T3	Male	S3	Adenocarcinoma	Alive	763	0.675787317
TCGA.AA.3556.01A	78	M0	N0	T2	Male	S1	Adenocarcinoma	Alive	700	0.268776365
TCGA.CM.6678.01A	63	M1	N1	T4	Female	S4	Adenocarcinoma	Alive	335	0.517302006
TCGA.AA.3851.01A	74	M0	N0	T3	Male	S2	Adenocarcinoma	Alive	1006	0.39965288
TCGA.CM.5860.01A	44	M0	N0	T3	Male	S2	Adenocarcinoma	Alive	974	0.43670196
TCGA.A6.5661.01A	80	M0	N0	T3	Female	S2	Adenocarcinoma	Alive	1020	0.396385296
TCGA.AA.A02F.01A	68	M1	N1	T3	Female	S4	Adenocarcinoma	Alive	1216	0.48425607
TCGA.AA.3861.01A	72	M0	N0	T3	Male	S2	Adenocarcinoma	Alive	914	0.281475031
TCGA.DM.A1DA.01A	71	M0	N2	T3	Female	S3	Adenocarcinoma	Dead	456	0.360333008
TCGA.CM.6162.01A	48	M0	N1	T3	Female	S3	Mucinous adenocarcinoma	Alive	365	0.87791608
TCGA.AA.3522.01A	67	M0	N0	T3	Male	S2	Adenocarcinoma	Alive	1127	0.220476156
TCGA.AA.A00U.01A	50	M0	N1	T3	Male	S3	Adenocarcinoma	Alive	518	0.533976928
TCGA.F4.6807.01A	51	M0	N2	T3	Female	S3	Adenocarcinoma	Alive	1309	0.783197512
TCGA.AA.3930.01A	66	M1	N2	T3	Male	S4	Adenocarcinoma	Dead	61	0.597260865
TCGA.AZ.6599.01A	72	M0	N0	T2	Male	S1	Adenocarcinoma	Dead	206	0.190039553
TCGA.AA.3947.01A	60	M0	N0	T4	Female	S2	Adenocarcinoma	Alive	1004	0.421430411
TCGA.AA.3841.01A	66	M0	N0	T3	Male	S2	Adenocarcinoma	Alive	1124	0.542970114
TCGA.CM.6171.01A	77	M0	N0	T2	Female	S1	Adenocarcinoma	Alive	427	0.339617196
TCGA.CM.4743.01A	69	M0	N0	T3	Male	S2	Adenocarcinoma	Alive	701	0.577688049
TCGA.NH.A6GA.01A	58	M0	N2	T4	Male	S3	Adenocarcinoma	Dead	484	0.407672268
TCGA.A6.2675.01A	78	M0	N0	T3	Male	S2	Adenocarcinoma	Alive	1321	0.429989194
TCGA.G4.6297.01A	55	M1	N2	T3	Female	S4	Adenocarcinoma	Alive	2506	0.719868561
TCGA.A6.5656.01B	74	M0	N0	T2	Male	S1	Adenocarcinoma	Alive	1001	0.436611184
TCGA.DM.A0X9.01A	71	M0	N0	T3	Female	S2	Adenocarcinoma	Alive	3641	0.272689508
TCGA.AA.3553.01A	61	M0	N0	T2	Female	S1	Adenocarcinoma	Alive	730	0.380803552
TCGA.DM.A0XD.01A	65	M0	N0	T3	Male	S2	Adenocarcinoma	Dead	743	0.387176229
TCGA.AA.3511.01A	64	M0	N0	T4	Male	S2	Adenocarcinoma	Alive	212	0.481547969
TCGA.A6.A56B.01A	57	M0	N1	T3	Male	S3	Adenocarcinoma	Dead	3306	0.440934315
TCGA.A6.5667.01A	40	M0	N1	T3	Female	S3	Adenocarcinoma	Alive	887	0.349876871
TCGA.AA.3866.01A	78	M0	N0	T2	Female	S1	Adenocarcinoma	Alive	518	0.474121251
TCGA.AA.A017.01A	57	M0	N0	T3	Female	S2	Adenocarcinoma	Alive	457	0.415920653
TCGA.CM.6674.01A	39	M0	N0	T3	Male	S2	Adenocarcinoma	Alive	394	0.487513695
TCGA.CM.6170.01A	73	M0	N0	T2	Female	S1	Adenocarcinoma	Alive	457	0.390174049
TCGA.AZ.4616.01A	82	M1	N2	T3	Female	S4	Adenocarcinoma	Dead	156	0.740358129
TCGA.AA.3994.01A	69	M0	N1	T3	Male	S3	Adenocarcinoma	Alive	822	0.590532081
TCGA.AA.3877.01A	83	M0	N0	T1	Female	S1	Adenocarcinoma	Alive	943	0.518092213
TCGA.WS.AB45.01A	52	M0	N0	T3	Female	S2	Adenocarcinoma	Alive	2130	0.953049572
TCGA.AA.A00L.01A	66	M0	N0	T3	Male	S2	Adenocarcinoma	Alive	1157	0.228713046
TCGA.CM.5864.01A	60	M0	N0	T2	Male	S1	Adenocarcinoma	Alive	457	0.311672866
TCGA.CA.5254.01A	42	M0	N0	T3	Female	S2	Mucinous adenocarcinoma	Alive	386	0.294935139
TCGA.D5.6898.01A	51	M0	N0	T2	Female	S1	Adenocarcinoma	Alive	229	0.481810622
TCGA.AA.3696.01A	75	M1	N1	T3	Female	S4	Mucinous adenocarcinoma	Dead	153	0.388708286
TCGA.DM.A280.01A	70	M0	N0	T3	Female	S2	Adenocarcinoma	Dead	472	0.496835747
TCGA.AA.A00O.01A	83	M0	N2	T3	Female	S3	Adenocarcinoma	Alive	822	0.487608662
TCGA.QG.A5YW.01A	55	M0	N2	T3	Female	S3	Mucinous adenocarcinoma	Alive	896	0.424066016
TCGA.AD.6965.01A	62	M0	N2	T4	Male	S3	Adenocarcinoma	Alive	805	0.387083686
TCGA.CK.4948.01B	45	M0	N1	T3	Female	S3	Adenocarcinoma	Alive	4502	0.418099374
TCGA.DM.A1HA.01A	82	M0	N2	T3	Male	S3	Adenocarcinoma	Alive	2600	0.356057524
TCGA.A6.2672.01A	82	M0	N1	T3	Female	S3	Adenocarcinoma	Alive	1419	0.717844162
TCGA.F4.6809.01A	52	M1	N1	T3	Female	S4	Mucinous adenocarcinoma	Dead	442	0.651681753
TCGA.CM.4748.01A	53	M0	N1	T4	Male	S3	Adenocarcinoma	Alive	792	0.548202007
TCGA.AA.3858.01A	67	M0	N0	T2	Male	S1	Mucinous adenocarcinoma	Alive	945	0.322492151
TCGA.D5.6531.01A	75	M0	N0	T3	Male	S2	Adenocarcinoma	Alive	540	0.394473087
TCGA.AA.3662.01A	80	M1	N2	T4	Female	S4	Adenocarcinoma	Alive	184	0.381881196
TCGA.AM.5820.01A	59	M1	N2	T4	Female	S4	Adenocarcinoma	Alive	14	0.488644937
TCGA.AA.A02K.01A	50	M1	N2	T4	Male	S4	Adenocarcinoma	Dead	426	0.415275639
TCGA.G4.6310.01A	69	M0	N1	T3	Male	S3	Adenocarcinoma	Alive	1935	0.331824466
TCGA.AD.6889.01A	76	M0	N0	T3	Male	S2	Adenocarcinoma	Dead	4588	0.453988385
TCGA.AA.A01R.01A	47	M0	N2	T3	Male	S3	Mucinous adenocarcinoma	Alive	1065	0.418805699
TCGA.AA.3975.01A	80	M0	N0	T2	Male	S1	Mucinous adenocarcinoma	Alive	1036	0.336264932
TCGA.5M.AAT6.01A	40	M1	N2	T4	Female	S4	Adenocarcinoma	Dead	290	0.859931643
TCGA.D5.6931.01A	77	M0	N2	T4	Male	S3	Adenocarcinoma	Alive	365	0.507858266
TCGA.D5.6924.01A	68	M0	N0	T3	Male	S2	Adenocarcinoma	Alive	435	0.539567654
TCGA.AA.3860.01A	53	M0	N1	T3	Female	S3	Mucinous adenocarcinoma	Alive	945	0.625475083
TCGA.A6.5665.01B	84	M0	N0	T3	Female	S2	Adenocarcinoma	Alive	671	0.78266978
TCGA.D5.6540.01A	66	M0	N0	T2	Male	S1	Adenocarcinoma	Alive	491	0.557576841
TCGA.CA.6718.01A	46	M0	N0	T3	Male	S2	Adenocarcinoma	Dead	309	0.643976512
TCGA.AA.3986.01A	73	M0	N0	T2	Male	S1	Adenocarcinoma	Alive	580	0.316790493
TCGA.A6.A566.01A	55	M0	N1	T4	Female	S3	Mucinous adenocarcinoma	Dead	758	0.789164184
TCGA.AZ.6608.01A	55	M0	N1	T2	Female	S3	Adenocarcinoma	Dead	59	0.197535764
TCGA.A6.5662.01A	46	M1	N2	T3	Male	S4	Mucinous adenocarcinoma	Alive	718	0.374638257
TCGA.AA.3831.01A	66	M0	N0	T3	Male	S2	Adenocarcinoma	Alive	547	0.460484228
TCGA.AA.A02H.01A	74	M1	N2	T3	Female	S4	Adenocarcinoma	Dead	61	0.40319275
TCGA.CM.6676.01A	82	M0	N0	T2	Male	S1	Adenocarcinoma	Alive	337	0.491283873
TCGA.AD.6899.01A	84	M0	N2	T4	Male	S3	Adenocarcinoma	Dead	224	0.618177812
TCGA.AA.3685.01A	69	M0	N0	T3	Male	S2	Adenocarcinoma	Alive	1127	0.403401132
TCGA.AA.3548.01A	71	M0	N2	T3	Female	S3	Mucinous adenocarcinoma	Alive	1034	0.281479227
TCGA.F4.6569.01A	60	M0	N0	T2	Male	S1	Adenocarcinoma	Alive	1087	0.643268149
TCGA.F4.6461.01A	41	M0	N2	T4	Female	S3	Adenocarcinoma	Dead	338	0.537810626
TCGA.F4.6854.01A	77	M0	N0	T3	Female	S2	Adenocarcinoma	Alive	16	0.425774917
TCGA.F4.6856.01A	45	M0	N0	T2	Male	S1	Adenocarcinoma	Alive	1074	0.440825791
TCGA.AY.A54L.01A	74	M0	N0	T2	Female	S1	Adenocarcinoma	Alive	525	0.498186211
TCGA.AA.3538.01A	54	M0	N0	T2	Female	S1	Adenocarcinoma	Alive	791	0.261023388
TCGA.AA.3842.01A	51	M0	N1	T2	Male	S3	Adenocarcinoma	Alive	1126	0.361754827
TCGA.AZ.4308.01A	47	M0	N1	T3	Female	S3	Adenocarcinoma	Alive	3324	0.538247195
TCGA.AA.3509.01A	54	M0	N0	T3	Female	S2	Adenocarcinoma	Alive	1915	0.305615064
TCGA.AA.3680.01A	67	M1	N2	T4	Female	S4	Mucinous adenocarcinoma	Dead	335	0.257856566
TCGA.NH.A8F7.06A	53	M0	N0	T3	Female	S2	Mucinous adenocarcinoma	Alive	543	0.10268075
TCGA.AA.3542.01A	69	M0	N2	T3	Male	S3	Adenocarcinoma	Alive	395	0.243442054
TCGA.A6.5656.01A	74	M0	N0	T2	Male	S1	Adenocarcinoma	Alive	1001	0.434399776
TCGA.A6.6650.01B	69	M0	N0	T3	Female	S2	Adenocarcinoma	Alive	627	0.381474108
TCGA.A6.6140.01A	62	M0	N0	T3	Male	S2	Adenocarcinoma	Alive	734	0.344442497
TCGA.AA.A024.01A	81	M0	N0	T3	Male	S2	Adenocarcinoma	Dead	1249	0.259662719
TCGA.A6.2682.01A	70	M1	N1	T4	Male	S4	Adenocarcinoma	Dead	424	0.692969714
TCGA.CM.6675.01A	35	M1	N2	T3	Male	S4	Adenocarcinoma	Alive	397	0.507279234
TCGA.DM.A1D7.01A	82	M0	N0	T3	Male	S2	Adenocarcinoma	Dead	810	0.362109288
TCGA.4T.AA8H.01A	42	M0	N0	T3	Female	S2	Adenocarcinoma	Alive	385	0.262625789
TCGA.A6.6653.01A	82	M0	N0	T2	Male	S1	Adenocarcinoma	Alive	742	0.505460713
TCGA.AA.3666.01A	68	M0	N1	T3	Male	S3	Adenocarcinoma	Dead	61	0.454209081
TCGA.AA.3655.01A	68	M0	N0	T3	Male	S2	Adenocarcinoma	Alive	1856	0.388058828
TCGA.AA.3673.01A	53	M0	N0	T3	Female	S2	Adenocarcinoma	Alive	1522	0.383810228
TCGA.AA.3952.01A	68	M0	N2	T3	Male	S3	Adenocarcinoma	Dead	61	0.582422941
TCGA.T9.A92H.01A	82	M0	N0	T3	Male	S2	Adenocarcinoma	Alive	362	0.253309912
TCGA.AY.4070.01A	50	M0	N2	T3	Female	S3	Adenocarcinoma	Dead	496	0.618453231
TCGA.AY.A8YK.01A	44	M1	N2	T3	Male	S4	Adenocarcinoma	Alive	573	0.422955334
TCGA.CK.4950.01A	68	M0	N1	T3	Female	S3	Adenocarcinoma	Alive	2599	0.529423555
TCGA.F4.6570.01A	78	M0	N0	T3	Female	S2	Adenocarcinoma	Dead	188	0.619308253
TCGA.AZ.6600.01A	64	M1	N1	T4	Male	S4	Mucinous adenocarcinoma	Dead	368	0.677544033
TCGA.AA.A00J.01A	80	M0	N1	T4	Male	S3	Adenocarcinoma	Alive	549	0.54539886
TCGA.AA.3667.01A	36	M0	N0	T2	Female	S1	Adenocarcinoma	Alive	426	0.379176891
TCGA.AA.3554.01A	62	M0	N0	T3	Female	S2	Adenocarcinoma	Alive	546	0.632346239
TCGA.AZ.6606.01A	81	M1	N2	T4	Male	S4	Adenocarcinoma	Dead	357	0.443224667
TCGA.D5.6922.01A	76	M0	N1	T3	Male	S3	Adenocarcinoma	Alive	308	0.340905516
TCGA.A6.6137.01A	55	M0	N1	T3	Male	S3	Adenocarcinoma	Alive	824	0.484366155
TCGA.AA.3495.01A	79	M0	N0	T2	Male	S1	Adenocarcinoma	Alive	1127	0.284918082
TCGA.A6.6650.01A	69	M0	N0	T3	Female	S2	Adenocarcinoma	Alive	627	0.339512632
TCGA.AA.3489.01A	75	M0	N0	T3	Male	S2	Adenocarcinoma	Dead	245	0.630952157
TCGA.G4.6322.01A	65	M0	N1	T3	Male	S3	Adenocarcinoma	Alive	792	0.526802286
TCGA.SS.A7HO.01A	44	M0	N0	T4	Female	S2	Adenocarcinoma	Alive	1829	0.314002061
TCGA.AA.3976.01A	70	M0	N1	T2	Male	S3	Adenocarcinoma	Alive	791	0.373226877
TCGA.AA.3811.01A	84	M0	N2	T3	Female	S3	Adenocarcinoma	Dead	336	0.53579337
TCGA.A6.2674.01B	71	M1	N2	T3	Male	S4	Adenocarcinoma	Alive	1331	0.665400546
TCGA.AA.3819.01A	41	M0	N0	T3	Female	S2	Adenocarcinoma	Alive	761	0.306607882
TCGA.A6.3809.01B	71	M0	N0	T4	Female	S2	Adenocarcinoma	Alive	996	0.454557634
TCGA.AA.A02Y.01A	73	M0	N0	T2	Male	S1	Adenocarcinoma	Alive	1216	0.258336893
TCGA.G4.6626.01A	90	M0	N0	T3	Male	S2	Adenocarcinoma	Dead	1	0.396266807
TCGA.AA.3875.01A	78	M0	N0	T1	Female	S1	Adenocarcinoma	Alive	549	0.274570563
TCGA.G4.6320.01A	73	M0	N1	T3	Male	S3	Adenocarcinoma	Alive	804	0.282319495
TCGA.CK.6748.01A	45	M1	N1	T3	Female	S4	Adenocarcinoma	Alive	61	0.581096241
TCGA.AA.3864.01A	71	M0	N0	T3	Male	S2	Adenocarcinoma	Alive	1612	0.435145673
TCGA.A6.6142.01A	56	M1	N1	T3	Female	S4	Adenocarcinoma	Alive	763	0.655672409
TCGA.A6.2678.01A	43	M0	N1	T3	Female	S3	Adenocarcinoma	Alive	1286	0.373188024
TCGA.CA.5796.01A	52	M0	N0	T3	Female	S2	Adenocarcinoma	Alive	377	0.219569039
TCGA.A6.A567.01A	56	M1	N1	T3	Male	S4	Adenocarcinoma	Dead	1881	0.482285448
TCGA.AA.3713.01A	68	M1	N0	T3	Male	S4	Adenocarcinoma	Alive	579	0.517762837
TCGA.A6.6648.01A	56	M1	N0	T3	Male	S4	Adenocarcinoma	Alive	766	0.335373636
TCGA.A6.A565.01A	34	M0	N2	T3	Female	S3	Adenocarcinoma	Dead	494	0.810273807
TCGA.A6.5660.01A	73	M0	N2	T3	Male	S3	Adenocarcinoma	Alive	888	0.469372729
TCGA.AZ.6601.01A	68	M0	N0	T3	Male	S2	Adenocarcinoma	Dead	3042	0.495165083
TCGA.A6.5665.01A	84	M0	N0	T3	Female	S2	Adenocarcinoma	Alive	671	0.471111709
TCGA.5M.AATE.01A	76	M0	N0	T3	Male	S2	Adenocarcinoma	Alive	1200	0.401065443
TCGA.A6.6780.01B	74	M0	N0	T3	Male	S2	Adenocarcinoma	Alive	612	0.545350479
TCGA.CM.6161.01A	36	M0	N0	T2	Female	S1	Adenocarcinoma	Alive	457	0.34518101
TCGA.AA.A01Q.01A	48	M0	N0	T3	Female	S2	Mucinous adenocarcinoma	Alive	31	0.377687948
TCGA.AZ.4313.01A	51	M0	N0	T1	Female	S1	Adenocarcinoma	Alive	2310	0.325700937
TCGA.A6.6652.01A	59	M1	N0	T3	Male	S4	Adenocarcinoma	Alive	751	0.417615573
TCGA.AA.A00E.01A	65	M0	N0	T3	Male	S2	Adenocarcinoma	Alive	913	0.553408534
TCGA.F4.6808.01A	54	M0	N0	T1	Female	S1	Adenocarcinoma	Alive	1024	0.471596557
TCGA.AA.A02W.01A	73	M0	N0	T2	Female	S1	Adenocarcinoma	Alive	1247	0.328331576
TCGA.DM.A28C.01A	74	M0	N0	T3	Male	S2	Adenocarcinoma	Dead	4950	0.30440524
TCGA.D5.6927.01A	34	M0	N0	T3	Male	S2	Adenocarcinoma	Alive	287	0.634982502
TCGA.AA.3980.01A	89	M0	N0	T2	Female	S1	Adenocarcinoma	Alive	242	0.251214628
TCGA.AA.3681.01A	77	M0	N1	T3	Female	S3	Adenocarcinoma	Alive	182	0.433306476
TCGA.AA.3492.01A	90	M0	N0	T3	Female	S2	Adenocarcinoma	Dead	1	0.433271905
TCGA.A6.2671.01A	85	M1	N2	T3	Male	S4	Mucinous adenocarcinoma	Dead	2457	0.581852162
TCGA.D5.6535.01A	80	M0	N1	T3	Female	S3	Adenocarcinoma	Alive	460	0.427051392
TCGA.AA.A029.01A	67	M0	N0	T3	Male	S2	Adenocarcinoma	Alive	1581	0.263273429
TCGA.CM.4747.01A	47	M1	N1	T4	Male	S4	Adenocarcinoma	Alive	761	0.378536369
TCGA.NH.A50T.01A	68	M0	N0	T3	Female	S2	Adenocarcinoma	Alive	553	0.254987207
TCGA.CM.6168.01A	84	M0	N0	T3	Female	S2	Adenocarcinoma	Alive	395	0.516477484
TCGA.AA.3518.01A	81	M0	N0	T3	Female	S2	Adenocarcinoma	Alive	31	0.423963745
TCGA.AA.A01T.01A	63	M0	N1	T3	Female	S3	Adenocarcinoma	Alive	1005	0.418570524
TCGA.RU.A8FL.01A	51	M0	N2	T3	Male	S3	Adenocarcinoma	Alive	1177	0.204139552
TCGA.A6.6651.01A	55	M0	N1	T3	Female	S3	Adenocarcinoma	Alive	662	0.720036495
TCGA.AA.3972.01A	72	M1	N1	T3	Male	S4	Adenocarcinoma	Alive	1551	0.382821721
TCGA.AA.3812.01A	82	M0	N0	T3	Female	S2	Mucinous adenocarcinoma	Alive	1066	0.494631751
TCGA.AY.A69D.01A	55	M0	N0	T3	Female	S2	Mucinous adenocarcinoma	Alive	543	0.401940036
TCGA.AA.A01Z.01A	68	M0	N0	T3	Male	S2	Adenocarcinoma	Alive	1126	0.384208395
TCGA.A6.3810.01B	62	M0	N0	T3	Male	S2	Adenocarcinoma	Alive	1111	0.41917203
TCGA.DM.A28H.01A	50	M0	N2	T3	Male	S3	Adenocarcinoma	Alive	3561	0.236638232
TCGA.G4.6586.01A	73	M0	N0	T3	Female	S2	Adenocarcinoma	Alive	1089	0.361637369
TCGA.G4.6317.02A	51	M0	N2	T3	Female	S3	Mucinous adenocarcinoma	Alive	1095	0.387004472
TCGA.D5.6928.01A	80	M0	N0	T3	Male	S2	Adenocarcinoma	Alive	354	0.621154119
TCGA.G4.6315.01A	66	M1	N1	T3	Male	S4	Mucinous adenocarcinoma	Alive	1883	0.265320522
TCGA.D5.6534.01A	62	M0	N0	T3	Female	S2	Adenocarcinoma	Alive	1316	0.713534624
TCGA.AA.3664.01A	74	M0	N0	T3	Female	S2	Mucinous adenocarcinoma	Alive	1643	0.397761417
TCGA.G4.6303.01A	54	M1	N1	T3	Female	S4	Adenocarcinoma	Dead	3885	0.439828806
TCGA.AA.3692.01A	47	M1	N2	T3	Female	S4	Adenocarcinoma	Dead	1095	0.434247049
TCGA.AA.3968.01A	55	M0	N0	T2	Female	S1	Mucinous adenocarcinoma	Alive	669	0.340689483
TCGA.F4.6805.01A	58	M0	N0	T3	Female	S2	Adenocarcinoma	Alive	1047	0.590181263
TCGA.AA.3560.01A	72	M0	N2	T3	Female	S3	Adenocarcinoma	Alive	608	0.372586803
TCGA.CM.5862.01A	80	M1	N1	T3	Male	S4	Mucinous adenocarcinoma	Dead	153	0.407898336
TCGA.A6.5659.01B	82	M0	N0	T2	Male	S1	Adenocarcinoma	Alive	926	0.24790189
TCGA.D5.6932.01A	69	M0	N0	T3	Male	S2	Adenocarcinoma	Alive	346	0.617463371
TCGA.AA.3982.01A	75	M0	N1	T3	Male	S3	Adenocarcinoma	Alive	822	0.29344668
TCGA.DM.A28A.01A	78	M0	N2	T3	Male	S3	Adenocarcinoma	Dead	1610	0.576346173
TCGA.CM.6172.01A	70	M0	N1	T3	Female	S3	Adenocarcinoma	Alive	335	0.307328342
TCGA.D5.6930.01A	67	M0	N0	T3	Male	S2	Adenocarcinoma	Alive	406	0.558828019
TCGA.D5.6529.01A	69	M0	N0	T3	Male	S2	Adenocarcinoma	Alive	614	0.425886495
TCGA.A6.2683.01A	57	M1	N0	T4	Female	S4	Adenocarcinoma	Dead	976	0.263579281
TCGA.CK.5913.01A	58	M0	N0	T3	Female	S2	Adenocarcinoma	Alive	1561	0.603851575
TCGA.AA.3496.01A	83	M0	N0	T3	Female	S2	Adenocarcinoma	Alive	31	0.513439433
TCGA.D5.5540.01A	73	M0	N0	T3	Male	S2	Adenocarcinoma	Alive	1706	0.308252366
TCGA.AA.A01F.01A	72	M0	N1	T3	Male	S3	Adenocarcinoma	Alive	974	0.301453691
TCGA.AA.3552.01A	85	M0	N2	T3	Male	S3	Adenocarcinoma	Dead	396	0.362012445
TCGA.F4.6855.01A	70	M0	N0	T3	Female	S2	Adenocarcinoma	Alive	1442	0.765077478
TCGA.AD.5900.01A	67	M0	N0	T2	Male	S1	Adenocarcinoma	Alive	370	0.484745243
TCGA.AA.3979.01A	84	M0	N0	T3	Male	S2	Adenocarcinoma	Alive	730	0.413025633
TCGA.AA.A01I.01A	76	M0	N0	T2	Male	S1	Adenocarcinoma	Alive	943	0.387258154
TCGA.A6.3810.01A	62	M0	N0	T3	Male	S2	Adenocarcinoma	Alive	1111	0.646756054
TCGA.3L.AA1B.01A	61	M0	N0	T2	Female	S1	Adenocarcinoma	Alive	475	0.347456938
TCGA.AA.3502.01A	73	M0	N0	T2	Male	S1	Adenocarcinoma	Alive	1065	0.283620956
TCGA.AA.A02E.01A	82	M1	N1	T3	Female	S4	Adenocarcinoma	Dead	90	0.48921967
TCGA.A6.5661.01B	80	M0	N0	T3	Female	S2	Adenocarcinoma	Alive	1020	0.510861434
TCGA.CM.4746.01A	61	M0	N0	T2	Male	S1	Adenocarcinoma	Alive	1126	0.3673464
TCGA.G4.6295.01A	70	M0	N0	T3	Female	S2	Adenocarcinoma	Alive	254	0.463708469
TCGA.AA.A01C.01A	75	M0	N1	T2	Male	S3	Mucinous adenocarcinoma	Alive	457	0.414646945
TCGA.G4.6588.01A	58	M0	N0	T3	Female	S2	Adenocarcinoma	Alive	796	0.429223535
TCGA.A6.2680.01A	72	M0	N0	T3	Female	S2	Adenocarcinoma	Alive	1068	0.494819038
TCGA.QG.A5YV.01A	64	M0	N1	T4	Female	S3	Adenocarcinoma	Alive	1301	0.378441098
TCGA.AA.3561.01A	72	M0	N0	T3	Male	S2	Adenocarcinoma	Alive	424	0.271649735
TCGA.AA.3525.01A	90	M0	N1	T3	Male	S3	Mucinous adenocarcinoma	Alive	1	0.406928365
TCGA.AA.3531.01A	75	M0	N0	T3	Female	S2	Adenocarcinoma	Alive	1035	0.237622694
TCGA.AA.3973.01A	69	M1	N1	T4	Male	S4	Adenocarcinoma	Alive	397	0.266104631
TCGA.AA.3555.01A	81	M0	N0	T3	Female	S2	Adenocarcinoma	Alive	911	0.487487099
